# Supplementary material for: Fast and accurate Ab Initio Protein structure prediction using deep learning potentials
Source: PubMed Central journal article supplement (PMC9518900; doi:10.1371/journal.pcbi.1010539), 2022-09-16
Supplement: pcbi.1010539.s001.pdf [file pcbi.1010539.s001.pdf]

**Table S1:** Impact of the different components of the DeepFold energy function on the structure modeling accuracy in terms of the average TM-score and the percent of correctly folded models (TM-scores  $\geq 0.5$ ) for the 221 benchmark proteins. The  $p$ -values were calculated using paired, two-sided Student's t-tests.

| <b>Energy Function</b> | <b>TM-score (<math>p</math>-value)</b> | <b>Correct Folds</b> |
|------------------------|----------------------------------------|----------------------|
| GE                     | 0.184 (8.4E-127)                       | 0.0%                 |
| GE+Cont                | 0.263 (1.3E-118)                       | 1.8%                 |
| GE+Cont+Dist           | 0.677 (1.9E-14)                        | 76.0%                |
| GE+Cont+Dist+Orien     | <b>0.751 (*)</b>                       | <b>92.3%</b>         |
