# Supplementary material for: Fast and accurate Ab Initio Protein structure prediction using deep learning potentials
Source: PubMed Central journal article supplement (PMC9518900; doi:10.1371/journal.pcbi.1010539), 2022-09-16
Supplement: pcbi.1010539.s006.pdf [file pcbi.1010539.s006.pdf]

**Table S6:** MAEs of the top  $n*L$  long-range distances by different distance predictors on the 221 test proteins. The  $p$ -values were calculated using paired, two-sided Student's t-tests between the DeepPotential results and the control methods.

| <b>Method</b> | <b>L/2 (<math>p</math>-value)</b> | <b>L (<math>p</math>-value)</b> | <b>2L (<math>p</math>-value)</b> | <b>5L (<math>p</math>-value)</b> | <b>10L (<math>p</math>-value)</b> |
|---------------|-----------------------------------|---------------------------------|----------------------------------|----------------------------------|-----------------------------------|
| DeepPotential | <b>0.974 (*)</b>                  | <b>1.018 (*)</b>                | <b>1.090 (*)</b>                 | <b>1.302 (*)</b>                 | <b>1.613 (*)</b>                  |
| trRosetta     | 1.050 (4.9E-02)                   | 1.154 (5.9E-04)                 | 1.328 (2.8E-06)                  | 1.730 (2.0E-07)                  | 2.241 (1.4E-11)                   |
| DMPfold       | 1.779 (1.4E-15)                   | 1.930 (7.6E-22)                 | 2.184 (7.5E-28)                  | 2.695 (1.6E-33)                  | 3.488 (1.1E-41)                   |
