# Supplementary material for: Fast and accurate Ab Initio Protein structure prediction using deep learning potentials
Source: PubMed Central journal article supplement (PMC9518900; doi:10.1371/journal.pcbi.1010539), 2022-09-16
Supplement: pcbi.1010539.s007.pdf [file pcbi.1010539.s007.pdf]

**Table S7:** Modeling results for trRosetta using DeepPotential’s spatial restraints vs DeepFold, where the  $p$ -value for the mean TM-score was calculated using a paired, two-sided Student’s  $t$ -test, while the  $p$ -value for the median TM-score were calculated using a two-sided, non-parametric Wilcoxon signed rank test.

| <b>Method</b>           | <b>Mean TM-score<br/>(<math>p</math>-value)</b> | <b>Median TM-score<br/>(<math>p</math>-value)</b> | <b>Correct Folds</b> |
|-------------------------|-------------------------------------------------|---------------------------------------------------|----------------------|
| trRosetta+DeepPotential | 0.735 (3.9E-09)                                 | 0.787 (4.2E-13)                                   | 90.5%                |
| DeepFold                | <b>0.751 (*)</b>                                | <b>0.800 (*)</b>                                  | <b>92.3%</b>         |
