# Supplementary material for: Fast and accurate Ab Initio Protein structure prediction using deep learning potentials
Source: PubMed Central journal article supplement (PMC9518900; doi:10.1371/journal.pcbi.1010539), 2022-09-16
Supplement: pcbi.1010539.s008.pdf [file pcbi.1010539.s008.pdf]

**Table S8:** Results on the 90 proteins that were non-redundant to the training set of DeepPotential. For the mean TM-scores, the  $p$ -values were calculated using paired, two-sided Student’s t-tests, while the  $p$ -values for the median TM-scores were calculated using two-sided, non-parametric Wilcoxon signed rank tests.

| Method     | Mean TM-score<br>( $p$ -value) | Median TM-score<br>( $p$ -value) | Correct Folds* | $TM_{\text{DeepFold}} >$<br>$TM_{\text{Method}}^\ddagger$ |
|------------|--------------------------------|----------------------------------|----------------|-----------------------------------------------------------|
| I-TASSER   | 0.384 (8.5E-31)                | 0.346 (4.7E-16)                  | 28.9%          | 93.3%                                                     |
| C-I-TASSER | 0.580 (3.0E-20)                | 0.605 (7.7E-15)                  | 66.7%          | 93.3%                                                     |
| DMPfold    | 0.643 (6.4E-16)                | 0.700 (2.6E-15)                  | 76.7%          | 90.0%                                                     |
| trRosetta  | 0.688 (7.5E-09)                | 0.719 (2.6E-09)                  | 87.8%          | 83.3%                                                     |
| DeepFold   | <b>0.730 (*)</b>               | <b>0.778 (*)</b>                 | <b>90.0%</b>   | -                                                         |

\* This column represents the percent of proteins with TM-scores  $\geq 0.5$ .

‡ This column indicates the percent of test proteins for which DeepFold generated a model with a higher TM-score than the control method.
