# Supplementary material for: Fast and accurate Ab Initio Protein structure prediction using deep learning potentials
Source: PubMed Central journal article supplement (PMC9518900; doi:10.1371/journal.pcbi.1010539), 2022-09-16
Supplement: pcbi.1010539.s009.pdf [file pcbi.1010539.s009.pdf]

**Table S9:** Modeling results for DeepFold and AlphaFold on the 31 CASP13 FM targets that the AlphaFold team submitted models for, where the  $p$ -values for the mean/median TM-scores were calculated using a paired, two-sided Student's  $t$ -tests and a two-sided Wilcoxon signed rank test, respectively.

| <b>Method</b> | <b>Mean TM-score<br/>(<math>p</math>-value)</b> | <b>Median TM-score<br/>(<math>p</math>-value)</b> | <b>Correct Folds</b> |
|---------------|-------------------------------------------------|---------------------------------------------------|----------------------|
| AlphaFold     | 0.589 (0.025)                                   | 0.641 (0.044)                                     | 64.5%                |
| DeepFold      | <b>0.636</b>                                    | <b>0.672</b>                                      | <b>80.6%</b>         |
