# Supplementary material for: Fast and accurate Ab Initio Protein structure prediction using deep learning potentials
Source: PubMed Central journal article supplement (PMC9518900; doi:10.1371/journal.pcbi.1010539), 2022-09-16
Supplement: pcbi.1010539.s019.pdf [file pcbi.1010539.s019.pdf]

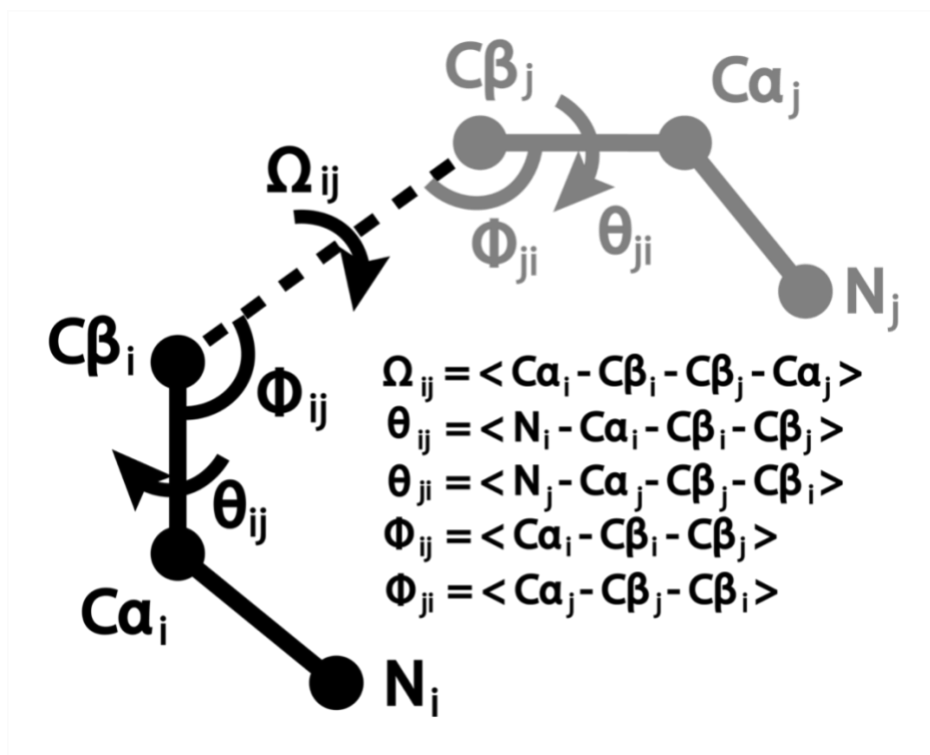

**Figure S7.** Definition of the inter-residue orientations predicted by DeepPotential, where  $\Omega$  and  $\theta$  are inter-residue torsion angles formed by the four indicated atoms and  $\varphi$  is an inter-residue angle formed by three atoms.
