# Supplementary material for: Fast and accurate Ab Initio Protein structure prediction using deep learning potentials
Source: PubMed Central journal article supplement (PMC9518900; doi:10.1371/journal.pcbi.1010539), 2022-09-16
Supplement: pcbi.1010539.s020.pdf [file pcbi.1010539.s020.pdf]

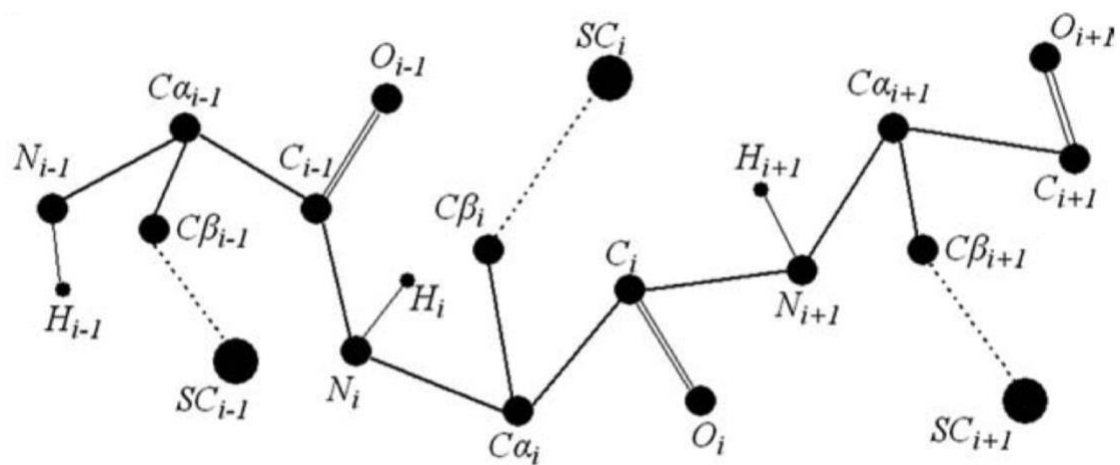

**Figure S8.** Depiction of the reduced model used to represent protein conformations during the DeepFold folding simulations, including the backbone atoms (N, H,  $C\alpha$ , C, and O) as well as the  $C\beta$  atoms and side-chain centers of mass for each amino acid type.
