# Supplementary material for: Fast and accurate Ab Initio Protein structure prediction using deep learning potentials
Source: PLOS journal article supplement (doi:10.1371/journal.pcbi.1010539), 2022-09-16
Supplement: S3 (10.1371/journal.pcbi.1010539.s003) [file journal.pcbi.1010539.s003]

**Table S3:** DeepFold results on the 38  $\beta$ -proteins in the test set with and without orientation restraints in terms of the average TM-score/RMSD and the percent of correctly folded models (TM-scores  $\geq 0.5$ ) for the 221 benchmark proteins. The  $p$ -values were calculated using paired, two-sided Student's t-tests.

| Method             | TM-score ( $p$ -value) | RMSD ( $p$ -value) | Correct Folds |
|--------------------|------------------------|--------------------|---------------|
| GE+Cont+Dist       | 0.590 (1.5E-04)        | 8.42 (3.4E-04)     | 60.5%         |
| GE+Cont+Dist+Orien | <b>0.706 (*)</b>       | <b>6.12 (*)</b>    | <b>86.8%</b>  |
