# Supplementary material for: Fast and accurate Ab Initio Protein structure prediction using deep learning potentials
Source: PLOS journal article supplement (doi:10.1371/journal.pcbi.1010539), 2022-09-16
Supplement: S4 (10.1371/journal.pcbi.1010539.s004) [file journal.pcbi.1010539.s004]

**Table S4:** Impact of the general energy (GE) function on DeepFold’s modeling performance. Specifically, the table presents the effect of the GE on the secondary structure SOV score, number of Ramachandran outliers, the MolProbity clash score, and the total MolProbity score on the overall dataset and those targets with poor physical model quality.

| Target Type<br>(# of Proteins)                | DeepFold<br>Energy Function | SS SOV        | Rama<br>Outliers | Clash<br>Score | MP-score     |
|-----------------------------------------------|-----------------------------|---------------|------------------|----------------|--------------|
| All Targets<br>(221)                          | w/o General Energy          | 79.68%        | 6.52             | 3.61           | 1.735        |
|                                               | with General Energy         | <b>79.71%</b> | <b>5.92</b>      | <b>3.13</b>    | <b>1.692</b> |
| MP-score <50 <sup>th</sup><br>Percentile (16) | w/o General Energy          | 58.41%        | 13.00            | 17.54          | 2.882        |
|                                               | with General Energy         | <b>61.44%</b> | <b>9.81</b>      | <b>8.58</b>    | <b>2.308</b> |
